# Supplementary material
Source: publisher figshare collection journal article supplement (https://sage.figshare.com/ndownloader/files/18613835)
Supplement: Supplementary file 1 [file 18613835]

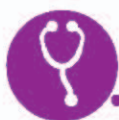

**SEE MD**

**4**

**STAND & MOVE**

High-low touch  
exercises

Movement with  
saccades and gaze  
stability at FAST speed

**6**

**FULL SPORT  
MOVEMENT**

**5**

**STAND & MOVE+**

Progress  
movement; jumps,  
turns, spins
